# Supplementary material for: The development of a health-related quality-of-life instrument for young people with narcolepsy: NARQoL-21
Source: PubMed Central journal article supplement (PMC5496267; doi:10.1186/s12955-017-0707-8), 2017-07-04
Supplement: 12955_2017_707_MOESM2_ESM.pdf [file 12955_2017_707_MOESM2_ESM.pdf]

## Additional file 2. NARQoL21 English / Swedish versions

|    | English                                              | Swedish                                                 |
|----|------------------------------------------------------|---------------------------------------------------------|
| 1  | I can keep up in lessons.                            | Jag hänger med på lektioner.                            |
| 2  | I feel more lazy than others.                        | Jag känner mig mer lat än andra.                        |
| 3  | I can sit still and concentrate.                     | Jag kan sitta still och koncentrera mig.                |
| 4  | I feel sad or low.                                   | Jag känner mig ledsen eller deppig.                     |
| 5  | I see obstacles for me in the future.                | Jag ser hinder för mig i framtiden.                     |
| 6  | I think I will get a driving license.                | Jag tror jag kommer att få körkort.                     |
| 7  | I stay awake when I read                             | Jag håller mig vaken när jag läser                      |
| 8  | Everything will be fine for me in the future.        | Allt kommer att gå bra för mig i framtiden              |
| 9  | I get angry very easily.                             | Jag blir väldigt lätt arg.                              |
| 10 | I give up easily.                                    | Jag ger lätt upp.                                       |
| 11 | I have problems to be awake all the time in school.  | Jag har problem med att vara vaken hela tiden i skolan. |
| 12 | I feel lonely.                                       | Jag känner mig ensam.                                   |
| 13 | I find it easy to get along with others.             | Jag har lätt att komma överens med andra.               |
| 14 | I will not travel as much as others.                 | Jag kommer inte att resa så mycket som andra.           |
| 15 | I get anxious.                                       | Jag får ångest.                                         |
| 16 | There will be good opportunities for me.             | Det kommer att finnas bra möjligheter för mig.          |
| 17 | I feel sure of myself.                               | Jag känner mig säker på mig själv.                      |
| 18 | I stay awake when I watch TV / movies.               | Jag håller mig vaken när jag tittar på tv/bio.          |
| 19 | Everything is going to be worse when I leave school. | Allt kommer bli sämre när jag slutar skolan             |
| 20 | I am sulky or irritated.                             | Jag är sur eller irriterad.                             |
| 21 | I stay awake on local public transport               | Jag håller mig vaken på lokaltrafik.                    |

An English version of the NARQoL-21 was translated using several steps: an initial forward translation (from Swedish to English) by two independent translators with a background in linguistics and quality of life research; a back translation (from English to Swedish), and finally a consensual version to check against the original NARQoL by all three translators and the originator of the instrument. Discrepancies were discussed and agreement achieved.
