# Supplementary material for: The development of a health-related quality-of-life instrument for young people with narcolepsy: NARQoL-21
Source: PubMed Central journal article supplement (PMC5496267; doi:10.1186/s12955-017-0707-8), 2017-07-04
Supplement: 12955_2017_707_MOESM3_ESM.pdf [file 12955_2017_707_MOESM3_ESM.pdf]

**Additional file 3. Table 9.**

**NARQoL-21 cut-off scores differentiating between optimal & suboptimal HrQoL**

| NARQoL-21 score | Sensitivity % | 1 – Specificity % |
|-----------------|---------------|-------------------|
| 19              | 0             | 0                 |
| 23              | 5             | 0                 |
| 27              | 5             | 1                 |
| 28              | 11            | 1                 |
| 31              | 16            | 1                 |
| 34              | 26            | 1                 |
| 35              | 32            | 1                 |
| 36              | 53            | 1                 |
| 38              | 63            | 2                 |
| 39              | 63            | 3                 |
| 41              | 74            | 3                 |
| 42              | 79            | 3                 |
| 43              | 79            | 4                 |
| 45              | 79            | 5                 |
| <b>47</b>       | <b>84</b>     | <b>8</b>          |
| 48              | 84            | 9                 |
| 49              | 84            | 10                |
| 51              | 84            | 12                |
| 53              | 84            | 12                |
| 54              | 84            | 14                |
